# Supplementary material
Source: PubMed Central journal article supplement (PMC6434451)
Supplement: 731964_supplementary_material.pdf [file 731964_supplementary_material.pdf]

## Supplemental material

### Supplemental Figure 1

There were no significant differences in doubling time between the young and old hMSCs.

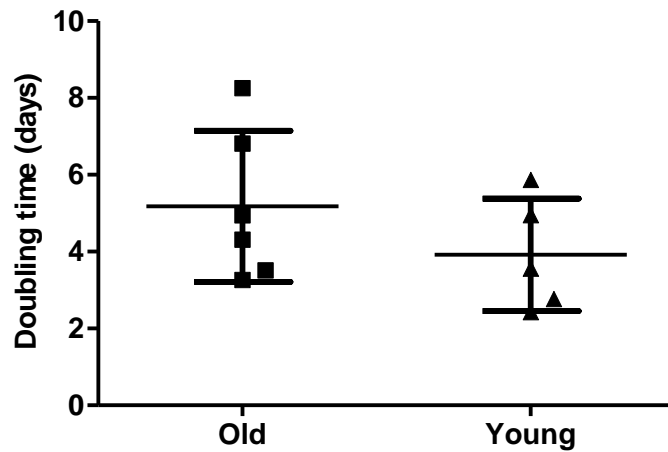

### Supplemental Figure 2

There were no significant differences in infarct volume between the three groups at D21.

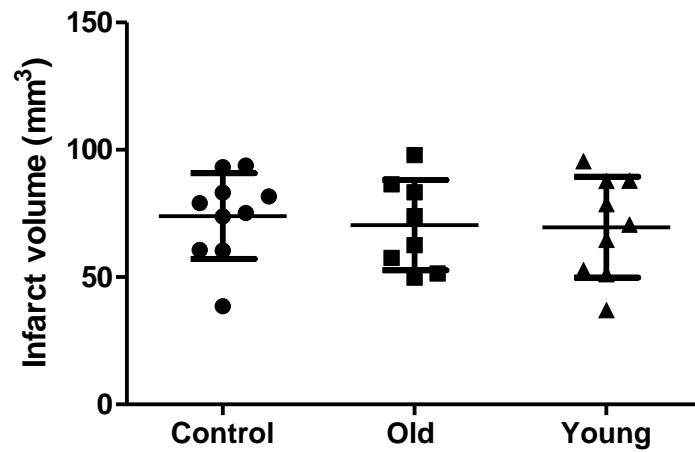

### Supplemental Figure 3

There were no significant differences in the number of STEM 121-positive hMSCs between the old (n=4) and young hMSC (n=4) groups at the peri-infarct cortex at D2 and D7. Stem 121 positive hMSCs were not observed at D21 in both groups.

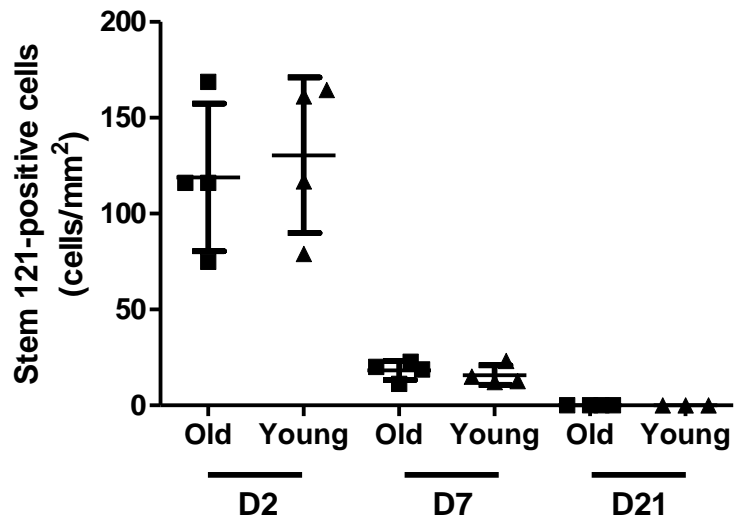

### Supplementary Table 1

| Rats with cerebral infarction                                       | Total number |              |
|---------------------------------------------------------------------|--------------|--------------|
| 1) Eligible mNSS from 6 to 9 points at 24 h post-stroke             | 70           |              |
| 2) Ineligible mNSS outside 6 to 9 points at 24 h post-stroke        | 16           |              |
| Total number of rats                                                | 86           |              |
| Control group                                                       | Total number | Death number |
| 1) Functional examination and histological analysis at D21          | 12           | 2            |
| 2) Analysis of trophic and chemotactic factors by Luminex and ELISA | 7            | 3            |
| Total number of rats                                                | 19           | 5            |
| Old hMSC group                                                      | Total number | Death number |
| 1) Functional examination and histological analysis at D21          | 12           | 4            |
| 2) Analysis of trophic and chemotactic factors by Luminex and ELISA | 4            | 0            |
| 3) Immunohistochemistry for Stem 121 at D2 and D7                   | 9            | 1            |
| Total number of rats                                                | 25           | 5            |
| Young hMSC group                                                    | Total number | Death number |
| 1) Functional examination and histological analysis at D21          | 11           | 2            |
| Exclusion due to postoperative cervical hematoma                    | 1            |              |
| 2) Analysis of trophic and chemotactic factors by Luminex and ELISA | 4            | 0            |
| 3) Immunohistochemistry for Stem 121 at D2 and D7                   | 10           | 2            |
| Total number of rats                                                | 26           | 4            |

hMSC, human mesenchymal stem cells; mNSS, modified Neurological Severity Score; ELISA, enzyme-linked immunosorbent assay

## Supplementary Table 2

### Modified Neurological Severity Score Points

---

|                                                                                                |    |
|------------------------------------------------------------------------------------------------|----|
| Motor tests                                                                                    |    |
| Raising rat by tail                                                                            | 3  |
| Flexion of forelimb                                                                            | 1  |
| Flexion of hindlimb                                                                            | 1  |
| Head moved > 10° to vertical axis within 30 s                                                  | 1  |
| Placing rat on floor (normal=0; maximum=3)                                                     | 3  |
| Normal walk                                                                                    | 0  |
| Inability to walk straight                                                                     | 1  |
| Circling toward paretic side                                                                   | 2  |
| Falls down to paretic side                                                                     | 3  |
| Sensory tests                                                                                  | 2  |
| Placing test (visual and tactile test)                                                         | 1  |
| Proprioceptive test (deep sensation, pushing paw against table edge to stimulate limb muscles) | 1  |
| Beam balance tests (normal=0; maximum=6)                                                       | 6  |
| Balances with steady posture                                                                   | 0  |
| Grasps side of beam                                                                            | 1  |
| Hugs beam and 1 limb falls down from beam                                                      | 2  |
| Hugs beam and 2 limb fall down from beam, or spins on beam (>60 s)                             | 3  |
| Attempts to balance on beam but falls off (>40 s)                                              | 4  |
| Attempts to balance on beam but falls off (>20 s)                                              | 5  |
| Falls off; no attempt to balance or hang on to beam (<20 s)                                    | 6  |
| Reflex absence and abnormal movements                                                          | 4  |
| Pinna reflex (head shake when auditory meatus is touched)                                      | 1  |
| Corneal reflex (eye blink when cornea is lightly touched with cotton)                          | 1  |
| Startle reflex (motor response to a brief noise from snapping a clipboard paper)               | 1  |
| Seizures, myoclonus, myodystony                                                                | 1  |
| Maximum points                                                                                 | 18 |

---

One point is awarded for inability to perform the tasks or for lack of a tested reflex: 13-18, severe injury; 7-12, moderate injury; 1-6, mild injury.

(Reference)

Chen J, Sanberg PR, Li Y, et al. Intravenous administration of human umbilical cord blood reduces behavioral deficits after stroke in rats. *Stroke*. 2001; 32: 2682-8.
